# Supplementary material for: Lithium storage improvement from hierarchical double-shelled SnO2 hollow spheres
Source: Royal Society of Chemistry journal article supplement (doi:10.1039/c4ra00690a), 2014-01-01
Supplement: c4ra00690a1.pdf [file c4ra00690a1.pdf]

## Lithium Storage Improvement from Hierarchical Double-Shelled SnO<sub>2</sub> Hollow Spheres

Shilong Jing,<sup>†</sup> Feng Gu,<sup>\*,†,‡</sup> Junhua Kong,<sup>‡</sup> Chunrong Ma,<sup>†</sup> Pooi See Lee,<sup>\*,‡</sup> and Chunzhong Li<sup>\*,†</sup>

### Experimental Section

**Synthesis of CH-SnO<sub>2</sub>:** The chemicals used in this study were of analytic grade and used as received (Aldrich). The approach of mesoporous silica preparing, remodeling and nanochain-loading has been reported previously.<sup>1-3</sup> In a typical synthesis, 125 mg remodeled-MS (rMS) was first dispersed in 30 ml of ethanol/water mixture with 37.5 % ethanol (vol %). 0.90 g of urea and 0.10 g of potassium stannate trihydrate were added to the above mixture. Then, the turbid suspension was transferred into 50 ml Teflon-lined stainless-steel autoclave, which was then heated in an airflow electric oven at 170 °C for 24 h. After the autoclave cooled down naturally, the product was harvested by centrifugation and washed with deionized water and ethanol before drying at 80 °C overnight. Coating SnO<sub>2</sub> onto as-synthesis SnO<sub>2</sub> nanochains loaded rMS was simply obtained by repeating the above hydrothermal process for 36 h. The rMS templates were finally removed by HF (2 wt %) after calcined at 600 °C for 5 h in air.

The CH-SnO<sub>2</sub> (80 wt %), conducting additive (10 wt %, Super-P carbon black), and polyvinylidene fluoride (PVDF, 10 wt %) binder in N-methylpyrrolidone (NMP) were mixed into homogeneous slurry. The slurry was then applied to a copper disk current collector and dried in vacuum at 120 °C. Electrochemical test cells were assembled in an argon-filled glovebox using the coated copper disk as the working electrode, lithium metal foil as the counter/reference electrode, and 1 M solution of LiPF<sub>6</sub> in a 50:50 w/w mixture of ethylene carbonate (EC) and dimethyl carbonate (DMC) as the electrolyte. The cells were charged and discharged galvanostatically at the rates of 100 mA g<sup>-1</sup> in the fixed voltage window from 5 mV to 2 V on a Neware CT - 3008W battery tester at room temperature.

### Capacity calculation of SnO<sub>2</sub> loose aggregates network:

Since the CH-SnO<sub>2</sub> structure was consisted of H-SnO<sub>2</sub> shell and SnO<sub>2</sub>LAs network inside, the specific capacity of CH-SnO<sub>2</sub> could be expressed by the following equation:

$$C_{CH} = (C_{LA} * P_{LA}) + (C_H * P_H) \quad (1)$$

Where C<sub>CH</sub>, C<sub>LA</sub> and C<sub>H</sub> are the specific capacity of CH-SnO<sub>2</sub>, SnO<sub>2</sub> LAs network and H-SnO<sub>2</sub> (mAh g<sup>-1</sup>) respectively, P<sub>LA</sub> and P<sub>H</sub> are the mass fraction (%) of SnO<sub>2</sub> LAs network and H-SnO<sub>2</sub>. As the SnO<sub>2</sub>-synthesis procedure of CH-SnO<sub>2</sub> could be divided into SnO<sub>2</sub> Las-synthesis (S<sub>LA</sub>) and SnO<sub>2</sub> shell-synthesis (S<sub>H</sub>), the mass-increase of S<sub>LA</sub> and S<sub>H</sub> have been measured and were almost the same, we define:

$$P_{LA} = P_H = 50\% \quad (2)$$

Since C<sub>CH</sub> (1885 mAh g<sup>-1</sup>) and C<sub>H</sub> (1192 mAh g<sup>-1</sup>) has been measured by galvanostatic measurement, the value of C<sub>LA</sub> could be calculated using equation (1), namely 2578 mAh g<sup>-1</sup>.

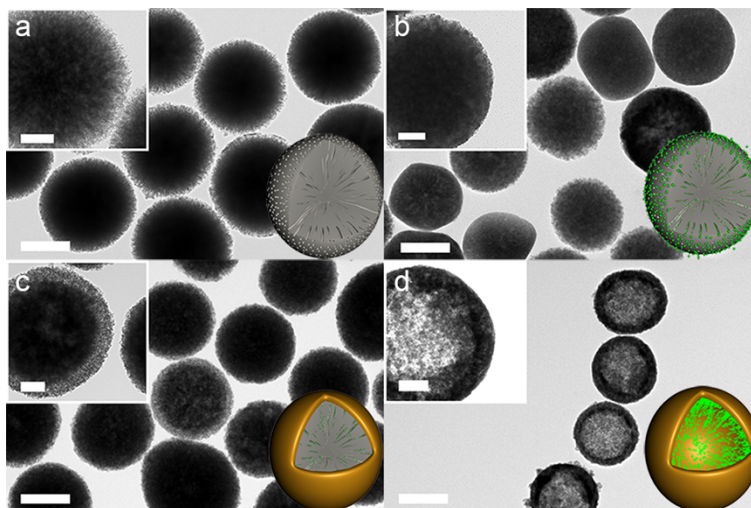

**Figure S1.** TEM images of rMSs (a), SnO<sub>2</sub> NCs loaded rMSs (b), CH-SnO<sub>2</sub> before (c) and after (d) removing rMSs. The insets of a-d are corresponding magnified TEM images and schematics respectively. The scale bars in a-d = 500 nm, in insets of a-d = 200 nm.

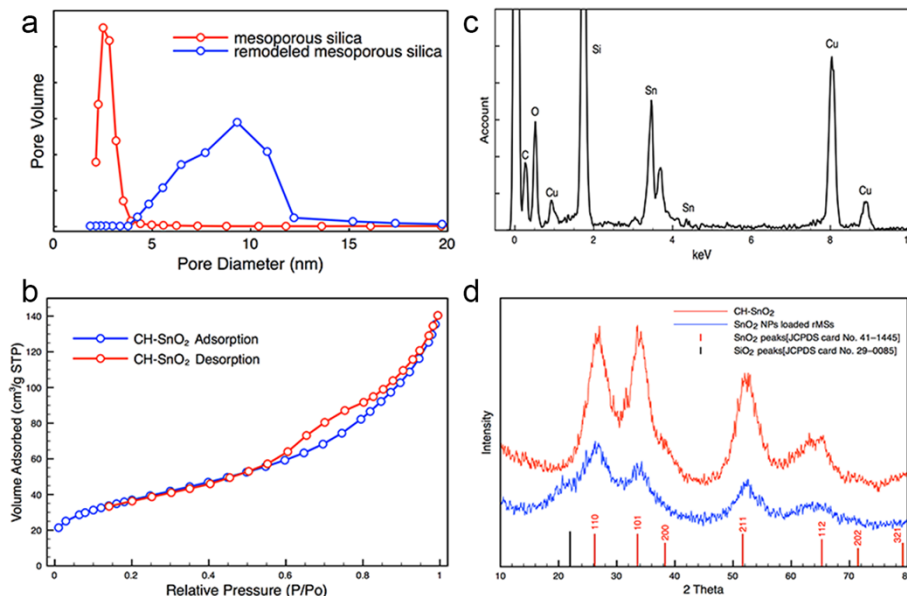

**Figure S2.** a) Pore diameter distribution of MS before and after remodeled; b) N<sub>2</sub> adsorption - desorption isotherm of CH-SnO<sub>2</sub>; c) EDS patterns of SnO<sub>2</sub> nanochains loaded rMSs; d) XRD patterns of SnO<sub>2</sub> nanochains loaded rMSs (blue curve) and CH-SnO<sub>2</sub> (red curve); e,f) HRTEM image of SnO<sub>2</sub> nanochains loaded rMSs; g) HRTEM image of CH-SnO<sub>2</sub> shell; h) TEM image of CH-SnO<sub>2</sub>; i) FESEM image of a broken H-SnO<sub>2</sub>.

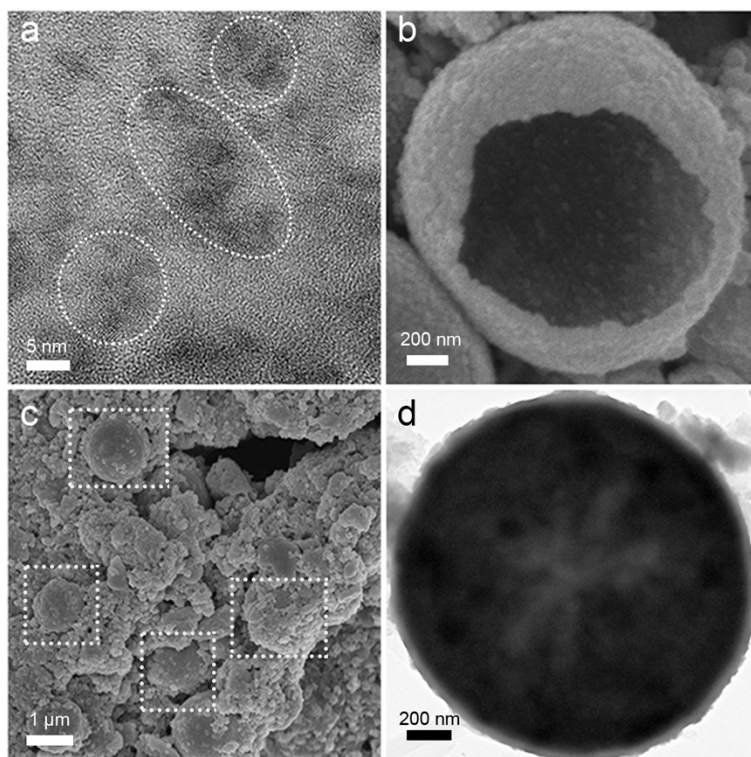

**Figure S3.** a) HRTEM image of SnO<sub>2</sub> nanochains loaded rMSs; b) FESEM image of a broken H-SnO<sub>2</sub>; c,d) FESEM and TEM images of CH-SnO<sub>2</sub> after 50 cycles of charge and discharge.

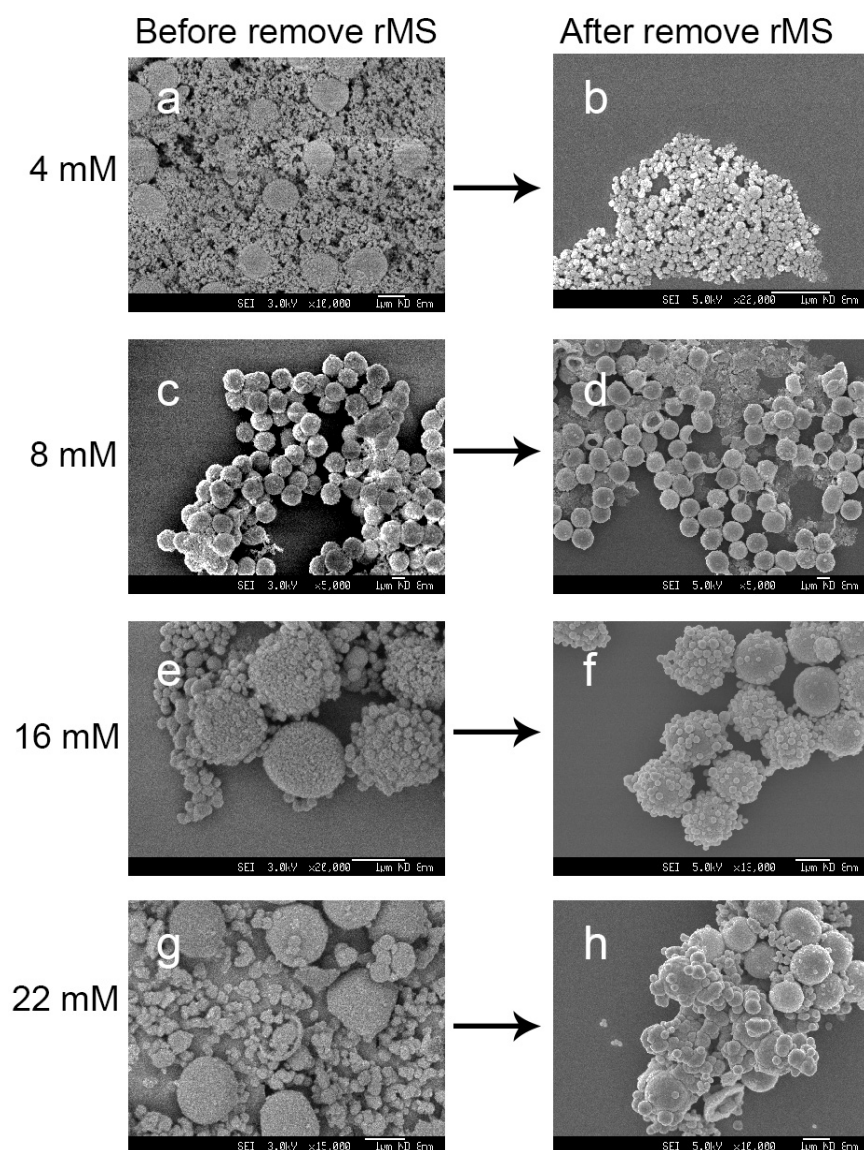

**Figure S4.** FESEM images of CH-SnO<sub>2</sub> before (left panel) and after (right panel) calcination and removal of rMSs. The concentration of stannate used in the synthesis as precursor of SnO<sub>2</sub> shells increased from A (4 mM) to H (22 mM).

#### REFERENCES

- (1) Grun, M. *Stud. Surf. Sci. Catal.***2007**, 1–11.
- (2) Wang, P.; Zhu, Y.; Yang, X.; Li, C.; Du, H. *Acta Mater.***2008**, 56, 1144–1150.
- (3) Gu, F.; Ren, X.; Zhang, J.; Shao, W.; Huang, G.; Li, C. *Ind. Eng. Chem. Res.***2011**, 50, 12542–12547.
